# Supplementary material for: Usefulness of B‐Type Natriuretic Peptide for Predicting the Risk of Stroke in Patients With Heart Failure With Preserved Ejection Fraction
Source: PubMed Central journal article supplement — J Am Heart Assoc. 2022 Jul 29;11(15):e024302. doi: 10.1161/JAHA.121.024302 (PMC9375473; doi:10.1161/jaha.121.024302), 2022-07-29
Supplement: JAH3-11-e024302-s001.pdf [file JAH3-11-e024302-s001.pdf]

## **SUPPLEMENTAL MATERIAL**

**Table S1. Basic characteristics of patients with Heart Failure with Preserved Ejection Fraction stratified by missed or documented BNP groups**

| <b>Variables</b>                       | <b>Missed BNP<br/>(n=2646)</b> | <b>Documented BNP<br/>(n=799)</b> | <b>P-value</b>   |
|----------------------------------------|--------------------------------|-----------------------------------|------------------|
| Random to<br>spironolactone, n (%)     | 1315 (49.7)                    | 407 (50.9)                        | 0.566            |
| <b>Demographics</b>                    |                                |                                   |                  |
| Age, years                             | 68.00 (60.0, 75.0)             | 71.00 (64.0, 79.0)                | <b>&lt;0.001</b> |
| Sex, male, n (%)                       | 1260 (47.6)                    | 410 (51.3)                        | 0.073            |
| Race, white, n (%)                     | 2427 (91.7)                    | 635 (79.5)                        | <b>&lt;0.001</b> |
| BMI, kg/m <sup>2</sup>                 | 30.59 (27.10, 35.0)            | 32.14 (27.73, 37.8)               | <b>&lt;0.001</b> |
| Smoking history, n (%)                 | 1195 (45.2)                    | 433 (54.2)                        | <b>&lt;0.001</b> |
| Alcohol drinking<br>drinks/week, n (%) |                                |                                   |                  |
| 0                                      | 2086 (78.8)                    | 601 (75.2)                        | <b>0.002</b>     |
| 1-5                                    | 444 (16.8)                     | 136 (17.0)                        |                  |
| 6-10                                   | 81 (3.1)                       | 45 (5.6)                          |                  |
| 10+                                    | 35 (1.3)                       | 17 (2.1)                          |                  |
| <b>Physical examination</b>            |                                |                                   |                  |
| EF, %                                  | 56.0 (51.0, 61.0)              | 58.0 (53.50, 63.0)                | <b>&lt;0.001</b> |
| NYHA(III-IV), n (%)                    | 835 (31.6)                     | 301 (37.7)                        | <b>0.001</b>     |
| Heart rate, bpm                        | 68.0 (62.0, 76.0)              | 68.0 (60.0, 76.0)                 | 0.135            |
| SBP, mmHg                              | 130.0 (120.0, 140.0)           | 129.0 (118.0, 138.0)              | <b>0.001</b>     |
| DBP, mmHg                              | 80.0 (70.0, 82.0)              | 70.0 (62.0, 80.0)                 | <b>&lt;0.001</b> |
| eGFR, ml/min*1.73m <sup>2</sup>        | 66.0 (54.92, 79.52)            | 63.1 (50.2, 76.7)                 | <b>&lt;0.001</b> |
| <b>Comorbidities, n (%)</b>            |                                |                                   |                  |
| Pervious                               | 2131 (80.5)                    | 361 (45.2)                        | <b>&lt;0.001</b> |

|                           |             |            |                  |
|---------------------------|-------------|------------|------------------|
| hospitalization for CHF   |             |            |                  |
| Pervious MI               | 703 (26.6)  | 190 (23.8) | 0.126            |
| Pervious stroke           | 181 (6.8)   | 84 (10.5)  | <b>0.001</b>     |
| Pervious CABG             | 293 (11.1)  | 150 (18.8) | <b>&lt;0.001</b> |
| Pervious PCI              | 320 (12.1)  | 180 (22.5) | <b>&lt;0.001</b> |
| COPD                      | 274 (10.4)  | 129 (16.1) | <b>&lt;0.001</b> |
| Hypertension              | 2424 (91.6) | 726 (90.9) | 0.556            |
| Peripheral artery disease | 225 (8.5)   | 94 (11.8)  | <b>0.007</b>     |
| Dyslipidemia              | 884 (33.4)  | 330 (41.3) | <b>&lt;0.001</b> |
| AF                        |             |            |                  |
| Diabetes                  | 782 (29.6)  | 336 (42.1) | <b>&lt;0.001</b> |
| <b>Medications, n (%)</b> |             |            |                  |
| Diuretic                  | 2137 (80.8) | 680 (85.1) | <b>0.006</b>     |
| ACEI                      | 1853 (70.0) | 399 (49.9) | <b>&lt;0.001</b> |
| ARB                       | 473 (17.9)  | 225 (28.2) | <b>&lt;0.001</b> |
| Beta blocker              | 2029 (76.7) | 647 (81.0) | <b>0.012</b>     |
| Calcium channel blocker   | 975 (36.8)  | 319 (39.9) | 0.125            |
| Aspirin                   | 1751 (66.2) | 499 (62.5) | 0.058            |
| Statin                    | 1288 (48.7) | 517 (64.7) | <b>&lt;0.001</b> |
| Warfarin                  | 525 (19.8)  | 262 (32.8) | <b>&lt;0.001</b> |

BMI: body mass index, EF: ejection fraction, NYHA: New York heart function class, bpm: beat per minutes, SBP: systolic blood pressure, DBP: diastolic blood pressure, GFR: estimated glomerular filtration rate, BNP: B-type natriuretic peptide, CHF: chronic heart failure, MI: myocardial infarction, CABG: coronary artery bypass grafting, PCI: Percutaneous coronary intervention, COPD: chronic obstructive pulmonary disease, AF: Atrial fibrillation, ACEI: angiotensin converting enzyme inhibitor, ARB: angiotensin receptor blocker.

**Table S2. Baseline echocardiographic characteristics of Heart Failure with Preserved Ejection Fraction patients stratified by stroke post randomization**

| <b>Variables</b>                                        | <b>Non-stroke</b>       | <b>Stroke</b>           | <b>P-value</b> |
|---------------------------------------------------------|-------------------------|-------------------------|----------------|
| Eccentric mitral regurgitation (n=232)                  | 4 (1.8%)                | 1 (14.3%)               | 0.143          |
| Moderate or greater mitral regurgitation (n=232)        | 36 (16.0%)              | 1 (14.3%)               | 1.000          |
| Interventricular septum thickness (n=315)               | 1.19 (1.05, 1.32)       | 1.26 (1.16, 1.39)       | 0.903          |
| Posterior wall thickness (n=315)                        | 1.13 (1.02, 1.27)       | 1.23 (1.15, 1.43)       | 0.048          |
| End-diastolic left ventricular diameter (n=315)         | 4.83±0.60               | 4.71±0.53               | 0.520          |
| Maximal left atrial anterior-posterior diameter (n=315) | 4.33 (3.98, 4.80)       | 4.15 (3.95, 4.80)       | 0.772          |
| Peak E wave velocity (n=284)                            | 92.78±30.36             | 106.81±35.91            | 0.176          |
| Peak A wave velocity (n=209)                            | 74.24±25.61             | 66.48±28.62             | 0.505          |
| Lateral early diastolic myocardial velocity (n=200)     | 7.47 (5.81, 9.91)       | 8.30 (7.67, 9.42)       | 0.235          |
| Lateral late diastolic myocardial velocity (n=157)      | 8.20 (5.82, 10.28)      | 6.09 (3.87, 16.90)      | 0.445          |
| Mitral regurgitation jet area (n=247)                   | 0.95 (0.00, 2.78)       | 0.00 (0.00, 2.04)       | 0.327          |
| E wave deceleration time (n=282)                        | 193.33 (156.67, 236.67) | 203.33 (195.00, 223.33) | 0.394          |
| Peak tricuspid regurgitation velocity (n=197)           | 271.91 (244.63, 306.89) | 236.73 (211.50, 305.39) | 0.113          |
| E/A ratio (n=208)                                       | 1.12 (0.82, 1.57)       | 1.75 (0.75, 3.40)       | 0.294          |
| End-systolic left ventricular diameter (n=315)          | 3.36 (3.00, 3.69)       | 3.27 (2.94, 3.58)       | 0.489          |
| Septal early diastolic myocardial velocity(n=223)       | 5.67 (4.53, 7.24)       | 6.95 (6.12, 8.17)       | 0.059          |
| Septal late diastolic myocardial velocity (n=162)       | 7.03 (5.15, 8.45)       | 4.74 (4.53, -)          | 0.071          |
| RV end diastolic area (n=237)                           | 19.78 (16.03, 24.03)    | 17.64 (17.01, 21.29)    | 0.563          |
| RV end systolic area (n=237)                            | 9.76 (7.72, 12.89)      | 8.77 (8.01, 11.78)      | 0.651          |
| Lateral systolic myocardial velocity (n=199)            | 6.44 (5.45, 7.58)       | 6.15 (4.88, 8.70)       | 0.707          |
| Septal systolic myocardial velocity (n=222)             | 5.65 (4.82, 6.69)       | 5.40 (4.57, 6.11)       | 0.509          |

|                                                                 |                         |                         |       |
|-----------------------------------------------------------------|-------------------------|-------------------------|-------|
| Left atrial area (n=286)                                        | 19.55 (16.48, 23.51)    | 22.13 (18.98, 24.05)    | 0.233 |
| Mean LV wall thickness (n=315)                                  | 1.16 (1.03, 1.28)       | 1.26 (1.15, 1.43)       | 0.061 |
| Lv mass (n=315)                                                 | 210.87 (167.28, 270.55) | 210.66 (195.87, 266.71) | 0.564 |
| Ejection Fraction (n=319)                                       | 59.89 (55.98, 65.18)    | 57.54 (56.18, 66.55)    | 0.618 |
| E/Em septal ratio (n=217)                                       | 15.30 (11.97, 19.78)    | 16.82 (13.66, 18.74)    | 0.797 |
| RV fractional area change (n=237)                               | 0.50 (0.43, 0.54)       | 0.48 (0.44, 0.54)       | 0.981 |
| E/Em lateral ratio (n=195)                                      | 10.94 (8.29, 15.46)     | 13.22 (8.48, 16.70)     | 0.692 |
| Simpson Ejection fraction (n=298)                               | 60.46 (56.34, 65.35)    | 58.34 (56.46, 66.59)    | 0.992 |
| Teicholtz end-diastolic volume (n=315)                          | 110.50 (88.92, 129.87)  | 105.96 (73.08, 126.07)  | 0.526 |
| Teicholtz end-systolic volume (n=315)                           | 46.27 (35.04, 57.69)    | 43.06 (33.40, 53.70)    | 0.489 |
| Teicholtz Ejection fraction (n=315)                             | 58.01 (53.19, 60.97)    | 59.44 (55.23, 60.94)    | 0.583 |
| End-diastolic volume (n=298)                                    | 96.08 (72.87, 120.72)   | 96.32 (88.19, 134.08)   | 0.290 |
| End-systolic volume (n=298)                                     | 37.00 (25.84, 48.36)    | 40.13 (34.97, 50.14)    | 0.357 |
| LA volume (n=293)                                               | 57.15 (45.59, 74.84)    | 67.96 (56.11, 73.07)    | 0.306 |
| LV relative wall thickness (n=315)                              | 0.47 (0.42, 0.53)       | 0.51 (0.49, 0.57)       | 0.015 |
| MR jet area-to-left atrial area ratio (n=232)                   | 0.05 (0.00, 0.13)       | 0.00 (0.00, 0.10)       | 0.445 |
| Stroke volume (n=298)                                           | 57.28 (44.88, 71.32)    | 63.09 (49.62, 86.63)    | 0.259 |
| Abnormal E' (n=248)                                             | 170 (71.1%)             | 5 (55.6%)               | 0.526 |
| Diastolic dysfunction grade (n=209)                             | 1.00 (0.00, 2.00)       | 0.00 (0.00, 2.25)       | 0.327 |
| Diastolic dysfunction grade (modified Olmsted criteria) (n=167) | 2.00 (1.00, 2.00)       | 2.50 (1.25, 3.00)       | 0.374 |
| Longitudinal Strain (n=205)                                     | -15.49±3.49             | -14.80±1.43             | 0.693 |
| Abnormal Longitudinal Strain (n=205)                            | 105 (52.2%)             | 3 (75.0%)               | 0.691 |
| Quartile of Longitudinal Strain (n=205)                         | 3.00 (1.00, 4.00)       | 2.50 (2.00, 3.75)       | 0.692 |
| Moderate or greater aortic stenosis (n=259)                     | 3 (1.2%)                | 0 (0.0%)                | 1.000 |
| Moderate aortic regurgitation (n=306)                           | 5 (1.7%)                | 0 (0.0%)                | 1.000 |

|                                                                |                         |                         |       |
|----------------------------------------------------------------|-------------------------|-------------------------|-------|
| Prosthetic valve (n=319)                                       | 13 (4.2%)               | 1 (9.1%)                | 0.395 |
| Was color doppler missing in study (n=319)                     | 12 (3.9%)               | 0 (0.0%)                | 1.000 |
| AV peak velocity (n=259)                                       | 139.23 (116.30, 173.48) | 140.09 (120.97, 164.89) | 0.931 |
| Right ventricular outflow tract velocity time integral (n=189) | 16.59 (13.88, 19.67)    | 21.92 (16.71, 23.88)    | 0.050 |
| Abnormal relative wall thickness(n=315)                        | 230 (75.7%)             | 11 (100%)               | 0.131 |
| Pulmonary vascular resistance (n=148)                          | 1.80 (1.57, 2.21)       | 1.64 (1.14, 1.99)       | 0.183 |
| Significant valvular disease (n=309)                           | 51 (17.1%)              | 2 (18.2%)               | 1.000 |

E = Early wave of mitral inflow, E' = early diastolic mitral annular velocity, LV = Left ventricle, ESV = end systolic volume, EDV = end diastolic volume.

**Table S3. Basic characteristics of patients with Heart Failure with Preserved Ejection Fraction stratified by BNP groups**

| <b>Variables</b>                | <b>BNP≤278 pg/mL<br/>(n=438)</b> | <b>BNP &gt;278 pg/mL<br/>(n=361)</b> | <b>P-value</b>   |
|---------------------------------|----------------------------------|--------------------------------------|------------------|
| Random to spironolactone        | 217 (49.5)                       | 190 (52.6)                           | 0.385            |
| <b>Demographics</b>             |                                  |                                      |                  |
| Age, years                      | 70.0 (62.0, 78.0)                | 73.0 (65.0, 81.0)                    | <b>&lt;0.001</b> |
| Sex, male                       | 209 (47.7)                       | 201 (55.7)                           | <b>0.025</b>     |
| Race, white                     | 345 (78.8)                       | 290 (80.3)                           | 0.586            |
| BMI, kg/m <sup>2</sup>          | 33.1 (28.3, 38.6)                | 31.18 (26.4, 37.2)                   | <b>0.004</b>     |
| Smoking history                 | 228 (52.1)                       | 206 (57.1)                           | 0.157            |
| Alcohol drinking<br>drinks/week |                                  |                                      | 0.791            |
| 0                               | 328 (74.9)                       | 273 (75.6)                           |                  |
| 1-5                             | 75 (17.1)                        | 61 (16.9)                            |                  |
| 6-10                            | 25 (5.7)                         | 20 (5.5)                             |                  |
| 10+                             | 10 (2.3)                         | 7 (1.9)                              |                  |
| <b>Physical examination</b>     |                                  |                                      |                  |
| EF, %                           | 60.0 (55.0, 64.0)                | 55.0 (50.0, 61.0)                    | <b>0.001</b>     |
| NYHA(III-IV)                    | 170 (38.8)                       | 131 (36.3)                           | 0.464            |
| Heart rate, bpm                 | 67.0 (60.0,76.0)                 | 69.0 (62.0, 76.0)                    | 0.095            |
| SBP, mmHg                       | 128.0 (118.0, 138.0)             | 130.0 (118.0, 139.0)                 | 0.779            |
| DBP, mmHg                       | 70.0 (64.0, 80.0)                | 70.0 (62.0, 80.0)                    | 0.203            |
| GFR, ml/min*1.73m <sup>2</sup>  | 64.3 (51.5, 79.3)                | 61.2 (47.0, 74.8)                    | <b>0.005</b>     |
| BNP, pg/ml                      | 149.0 (116.0, 199.8)             | 483.0 (358.5, 720.5)                 | <b>&lt;0.001</b> |
| <b>Comorbidities, n (%)</b>     |                                  |                                      |                  |

|                                  |            |            |                  |
|----------------------------------|------------|------------|------------------|
| Pervious hospitalization for CHF | 188 (42.9) | 173 (47.9) | 0.158            |
| Pervious MI                      | 107 (24.4) | 83 (23.0)  | 0.635            |
| Pervious stroke                  | 47 (10.7)  | 37 (10.2)  | 0.825            |
| Pervious CABG                    | 74 (16.9)  | 76 (21.1)  | 0.134            |
| Pervious PCI                     | 92 (21.0)  | 88 (24.4)  | 0.256            |
| COPD                             | 72 (16.4)  | 57 (15.8)  | 0.804            |
| Hypertension                     | 397 (90.6) | 329 (91.1) | 0.808            |
| Peripheral artery disease        | 48 (11.0)  | 46 (12.7)  | 0.436            |
| Dyslipidemia                     | 324 (74.0) | 265 (73.4) | 0.857            |
| AF                               | 160 (36.5) | 170 (47.1) | <b>0.003</b>     |
| Diabetes                         | 171 (39.0) | 165 (45.7) | 0.058            |
| <b>Medications, n (%)</b>        |            |            |                  |
| Diuretic                         | 355 (81.1) | 325 (90.0) | <b>&lt;0.001</b> |
| ACEI                             | 209 (47.7) | 190 (52.6) | 0.167            |
| ARB                              | 124 (28.3) | 101 (28.0) | 0.917            |
| Beta blocker                     | 341 (77.9) | 306 (84.8) | <b>0.013</b>     |
| Calcium channel blocker          | 186 (42.5) | 133 (36.8) | 0.106            |
| Aspirin                          | 284 (64.8) | 215 (59.6) | 0.125            |
| Statin                           | 286 (65.3) | 231 (64.0) | 0.700            |
| Warfarin                         | 133 (30.4) | 129 (35.7) | 0.108            |
| <b>Scores</b>                    |            |            |                  |
| CHADS2                           | 3 (2-3)    | 3 (2-3)    | <b>0.033</b>     |
| CHA2DS2-VASc                     | 4 (4-5)    | 5 (4-5)    | 0.181            |

---

|          |         |         |              |
|----------|---------|---------|--------------|
| R2CHADS2 | 4 (3-5) | 4 (3-5) | <b>0.008</b> |
|----------|---------|---------|--------------|

---

BMI: body mass index, EF: ejection fraction, NYHA: New York heart function class, bpm: beat per minutes, SBP: systolic blood pressure, DBP: diastolic blood pressure, GFR: estimated glomerular filtration rate, BNP: B-type natriuretic peptide, CHF: chronic heart failure, MI: myocardial infarction, CABG: coronary artery bypass grafting, PCI: Percutaneous coronary intervention, COPD: chronic obstructive pulmonary disease, AF: Atrial fibrillation, ACEI: angiotensin converting enzyme inhibitor, ARB: angiotensin receptor blocker.

**Table S4. Baseline echocardiographic characteristics of Heart Failure with Preserved Ejection Fraction patients stratified by BNP groups**

| <b>Variables</b>                                        | <b>BNP≤278 pg/mL</b>    | <b>BNP &gt;278 pg/mL</b> | <b>P-value</b> |
|---------------------------------------------------------|-------------------------|--------------------------|----------------|
| Eccentric mitral regurgitation (n=232)                  | 0 (0.0%)                | 5 (4.4%)                 | 0.062          |
| Moderate or greater mitral regurgitation (n=232)        | 9 (7.6%)                | 28 (24.8%)               | 0.000          |
| Interventricular septum thickness (n=315)               | 1.15 (1.04, 1.28)       | 1.23 (1.08, 1.35)        | 0.009          |
| Posterior wall thickness (n=315)                        | 1.11 (1.01, 1.25)       | 1.19 (1.03, 1.30)        | 0.011          |
| End-diastolic left ventricular diameter (n=315)         | 4.83±0.57               | 4.81±0.62                | 0.827          |
| Maximal left atrial anterior-posterior diameter (n=315) | 4.22 (3.95, 4.66)       | 4.46 (4.03, 4.87)        | 0.004          |
| Peak E wave velocity (n=284)                            | 87.60±29.50             | 99.53±30.63              | 0.001          |
| Peak A wave velocity (n=209)                            | 74.89±23.78             | 72.85±28.18              | 0.585          |
| Lateral early diastolic myocardial velocity (n=200)     | 7.57 (6.01, 9.64)       | 7.44 (5.66, 10.54)       | 0.906          |
| Lateral late diastolic myocardial velocity (n=157)      | 8.51 (6.25, 10.57)      | 7.62 (5.03, 9.80)        | 0.056          |
| Mitral regurgitation jet area (n=247)                   | 0.71 (0.00, 1.93)       | 1.37 (0.00, 3.81)        | 0.003          |
| E wave deceleration time (n=282)                        | 195.00 (163.33, 240.83) | 193.33 (140.00, 226.67)  | 0.070          |
| Peak tricuspid regurgitation velocity (n=197)           | 261.88 (241.89, 296.08) | 277.30 (248.43, 318.27)  | 0.039          |
| E/A ratio (n=208)                                       | 1.03 (0.82, 1.40)       | 1.34 (0.83, 1.92)        | 0.017          |
| End-systolic left ventricular diameter (n=315)          | 3.23 (2.99, 3.64)       | 3.41 (3.01, 3.72)        | 0.398          |
| Septal early diastolic myocardial velocity(n=223)       | 5.66 (4.54, 7.37)       | 5.79 (4.49, 7.20)        | 0.982          |
| Septal late diastolic myocardial velocity (n=162)       | 7.60 (6.31, 9.16)       | 5.43 (4.48, 7.39)        | 0.000          |
| RV end diastolic area (n=237)                           | 18.98 (16.46, 23.01)    | 19.80 (15.96, 24.98)     | 0.343          |
| RV end systolic area (n=237)                            | 9.67 (7.65, 12.16)      | 9.97 (7.94, 13.25)       | 0.169          |
| Lateral systolic myocardial velocity (n=199)            | 6.54 (5.55, 7.73)       | 6.22 (5.19, 7.54)        | 0.189          |
| Septal systolic myocardial velocity (n=222)             | 6.12 (5.09, 6.74)       | 5.33 (4.57, 6.30)        | 0.004          |

|                                                                 |                         |                         |       |
|-----------------------------------------------------------------|-------------------------|-------------------------|-------|
| Left atrial area (n=286)                                        | 18.71 (16.06, 22.90)    | 20.42 (17.51, 24.31)    | 0.006 |
| Mean LV wall thickness (n=315)                                  | 1.13 (1.03, 1.25)       | 1.21 (1.06, 1.33)       | 0.009 |
| Lv mass (n=315)                                                 | 203.15 (165.63, 257.79) | 217.17 (172.72, 277.64) | 0.067 |
| Ejection Fraction (n=319)                                       | 61.30 (56.31, 66.48)    | 58.88 (55.58, 63.44)    | 0.016 |
| E/Em septal ratio (n=217)                                       | 14.83 (11.55, 18.57)    | 16.70 (13.35, 21.89)    | 0.015 |
| RV fractional area change (n=237)                               | 0.50 (0.44, 0.55)       | 0.49 (0.43, 0.54)       | 0.259 |
| E/Em lateral ratio (n=195)                                      | 10.66 (7.91, 14.18)     | 12.05 (8.39, 16.68)     | 0.088 |
| Simpson Ejection fraction (n=298)                               | 61.57 (56.76, 66.62)    | 59.38 (56.03, 63.64)    | 0.032 |
| Teicholtz end-diastolic volume (n=315)                          | 107.52 (90.29, 129.99)  | 110.95 (85.88, 128.88)  | 0.972 |
| Teicholtz end-systolic volume (n=315)                           | 44.89 (34.81, 55.71)    | 47.83 (35.25, 58.79)    | 0.398 |
| Teicholtz Ejection fraction (n=315)                             | 58.73 (54.57, 61.49)    | 57.53 (52.88, 60.20)    | 0.052 |
| End-diastolic volume (n=298)                                    | 97.54 (73.30, 121.41)   | 90.36 (73.37, 121.80)   | 0.991 |
| End-systolic volume (n=298)                                     | 36.37 (25.37, 47.03)    | 38.83 (27.27, 49.96)    | 0.243 |
| LA volume (n=293)                                               | 54.43 (42.39, 73.41)    | 62.16 (49.28, 76.74)    | 0.019 |
| LV relative wall thickness (n=315)                              | 0.46 (0.42, 0.52)       | 0.49 (0.44, 0.54)       | 0.023 |
| MR jet area-to-left atrial area ratio (n=232)                   | 0.04 (0.00, 0.10)       | 0.08 (0.00, 0.17)       | 0.006 |
| Stroke volume (n=298)                                           | 59.15 (44.88, 74.43)    | 55.95 (44.98, 68.75)    | 0.419 |
| Abnormal E' (n=248)                                             | 95 (72%)                | 80 (69.0%)              | 0.604 |
| Diastolic dysfunction grade (n=209)                             | 1.00 (0.00, 2.00)       | 1.00 (0.00, 2.00)       | 0.768 |
| Diastolic dysfunction grade (modified Olmsted criteria) (n=167) | 2.00 (1.00, 2.00)       | 2.00 (1.00, 3.00)       | 0.188 |
| Longitudinal Strain (n=205)                                     | -15.95±3.55             | -14.85±3.25             | 0.024 |
| Abnormal Longitudinal Strain (n=205)                            | 52 (44.1%)              | 56 (64.4%)              | 0.004 |
| Quartile of Longitudinal Strain (n=205)                         | 2.00 (1.00, 3.00)       | 3.00 (2.00, 4.00)       | 0.013 |
| Moderate or greater aortic stenosis (n=259)                     | 2 (1.5%)                | 1 (0.8%)                | 1.000 |
| Moderate aortic regurgitation (n=306)                           | 2 (1.2%)                | 3 (2.2%)                | 0.836 |

|                                                                |                         |                         |       |
|----------------------------------------------------------------|-------------------------|-------------------------|-------|
| Prosthetic valve (n=319)                                       | 7 (4.1%)                | 7 (4.8%)                | 0.764 |
| Was color doppler missing in study (n=319)                     | 11 (6.4%)               | 1 (0.7%)                | 0.007 |
| AV peak velocity (n=259)                                       | 141.04 (118.53, 173.48) | 137.35 (112.63, 172.28) | 0.283 |
| Right ventricular outflow tract velocity time integral (n=189) | 17.70 (14.42, 21.27)    | 16.22 (13.23, 19.35)    | 0.104 |
| Abnormal relative wall thickness(n=315)                        | 123 (72.8%)             | 118 (80.8%)             | 0.093 |
| Pulmonary vascular resistance (n=148)                          | 1.72 (1.47, 2.03)       | 1.94 (1.64, 2.32)       | 0.005 |
| Significant valvular disease (n=309)                           | 16 (9.8%)               | 37 (25.3%)              | 0.000 |

E = Early wave of mitral inflow, E' = early diastolic mitral annular velocity, LV= Left ventricle, ESV= end systolic volume, EDV= end diastolic volume.

**Table S5. C-index, NRI and IDI for evaluating improvement to predict stroke after adding BNP to scores of CHADS2, CHA2DS2-VASc, R2CHADS2 in different subgroups in patients with Heart Failure with Preserved Ejection Fraction**

| Clinical model                                            | Clinical model+BNP   |                      | Clinical model VS Clinical model+BNP |                                  |                    |                     |                   |
|-----------------------------------------------------------|----------------------|----------------------|--------------------------------------|----------------------------------|--------------------|---------------------|-------------------|
|                                                           | C-index<br>(95%CI)   | C-index<br>(95%CI)   | P value for<br>C-index               | Continuous<br>NRI (%)<br>(95%CI) | P value for<br>NRI | IDI (%)<br>(95%CI)  | P value for IDI   |
| <b>Excluding patients with AF (n=469)</b>                 |                      |                      |                                      |                                  |                    |                     |                   |
| <b>CHADS2</b>                                             | 0.71<br>(0.63, 0.79) | 0.81<br>(0.73, 0.89) | 0.1044                               | 34.8<br>(0.4, 60.3)              | <b>0.0270</b>      | 2.1<br>(0.3, 8.8)   | <b>&lt;0.0001</b> |
| <b>CHA2DS2-<br/>VASc</b>                                  | 0.67<br>(0.54, 0.80) | 0.77<br>(0.67, 0.87) | 0.2649                               | 35.6<br>(1.5, 61.2)              | <b>0.0330</b>      | 1.3<br>(0.2, 9.4)   | <b>0.0270</b>     |
| <b>R2CHADS2</b>                                           | 0.73<br>(0.62, 0.84) | 0.80<br>(0.69, 0.91) | 0.3304                               | 34.8<br>(0.3, 60.7)              | <b>0.0330</b>      | 2.70<br>(0.3, 13.4) | <b>0.0070</b>     |
| <b>Excluding patients from Georgia and Russia (n=695)</b> |                      |                      |                                      |                                  |                    |                     |                   |
| <b>CHADS2</b>                                             | 0.67<br>(0.61, 0.73) | 0.78<br>(0.70, 0.85) | 0.0126                               | 36.0<br>(16.0, 52.3)             | <b>&lt;0.0001</b>  | 3.0<br>(0.8, 6.0)   | <b>0.0130</b>     |
| <b>CHA2DS2-<br/>VASc</b>                                  | 0.64<br>(0.54, 0.73) | 0.75<br>(0.68, 0.81) | 0.0434                               | 36.6<br>(12.0, 53.5)             | <b>0.0070</b>      | 2.1<br>(0.5, 5.8)   | <b>&lt;0.0001</b> |
| <b>R2CHADS2</b>                                           | 0.69<br>(0.61, 0.77) | 0.78<br>(0.70, 0.86) | 0.0503                               | 36.0<br>(13.8, 52.3)             | <b>0.0130</b>      | 3.2<br>(0.7, 7.1)   | <b>&lt;0.0001</b> |
| <b>Excluding patients using warfarin (n=537)</b>          |                      |                      |                                      |                                  |                    |                     |                   |
| <b>CHADS2</b>                                             | 0.69<br>(0.63, 0.76) | 0.80<br>(0.74, 0.87) | 0.0499                               | 35.0<br>(4.3, 59.0)              | <b>0.0130</b>      | 2.2<br>(0.4, 9.2)   | <b>&lt;0.0001</b> |
| <b>CHA2DS2-<br/>VASc</b>                                  | 0.74<br>(0.63, 0.84) | 0.81<br>(0.74, 0.89) | 0.0170                               | 35.7<br>(5.4, 59.2)              | <b>0.0070</b>      | 1.8<br>(0.30, 10.9) | <b>0.0070</b>     |

---

|                 |              |              |        |            |               |             |                   |
|-----------------|--------------|--------------|--------|------------|---------------|-------------|-------------------|
| <b>R2CHADS2</b> | 0.73         | 0.81         | 0.1920 | 35.0       | <b>0.0130</b> | 2.7         | <b>&lt;0.0001</b> |
|                 | (0.64, 0.82) | (0.73, 0.89) |        | (4.3,59.0) |               | (0.60,12.0) |                   |

---

BNP: B-type natriuretic peptide, CI: confidence interval, NRI: net reclassification improvement, IDI: the integrated discrimination improvement, AF: atrial fibrillation.

**Table S6. Basic characteristics of patients with Heart Failure with Preserved Ejection Fraction stratified by BNP groups which matched basing propensity score**

| <b>Variables</b>                | <b>BNP≤278 pg/mL<br/>(n=313)</b> | <b>BNP &gt;278 pg/mL<br/>(n=313)</b> | <b>P-<br/>value</b> |
|---------------------------------|----------------------------------|--------------------------------------|---------------------|
| Random to spironolactone        | 151 (48.2)                       | 170 (54.3)                           | 0.15                |
| <b>Demographics</b>             |                                  |                                      |                     |
| Age, years                      | 73 (65, 80)                      | 72 (64, 79)                          | 0.482               |
| Sex, male                       | 156 (49.8)                       | 166 (53.0)                           | 0.472               |
| Race, white                     | 251 (80.2)                       | 246 (78.6)                           | 0.693               |
| BMI, kg/m <sup>2</sup>          | 33.25 (28.28, 37.59)             | 31.93 (27.31, 37.67)                 | 0.295               |
| Smoking history                 | 166 (53.0)                       | 173 (55.3)                           | 0.630               |
| Alcohol drinking<br>drinks/week |                                  |                                      | 0.681               |
| 0                               | 233 (74.4)                       | 240 (76.7)                           |                     |
| 1-5                             | 52 (16.6)                        | 52 (16.6)                            |                     |
| 6-10                            | 21 (6.7)                         | 14 (4.5)                             |                     |
| 10+                             | 7 (2.2)                          | 7 (2.2)                              |                     |
| <b>Physical examination</b>     |                                  |                                      |                     |
| EF, %                           | 58.00 (53.00, 62.00)             | 58.00 (54.00, 62.00)                 | 0.811               |
| NYHA(III-IV)                    | 124 (39.6)                       | 114 (36.4)                           | 0.459               |
| Heart rate, bpm                 | 68 (60, 75)                      | 69 (62, 76)                          | 0.201               |
| SBP, mmHg                       | 128 (118, 138)                   | 130 (118, 139)                       | 0.813               |
| DBP, mmHg                       | 70 (62, 80)                      | 71 (62, 80)                          | 0.615               |
| GFR, ml/min*1.73m <sup>2</sup>  | 59.98 (50.05, 75.59)             | 63.44 (48.53, 75.59)                 | 0.363               |
| BNP, pg/ml                      | 168.00 (130.00, 218.00)          | 475.00 (354.00, 717.00)              | <0.001              |
| <b>Comorbidities, n (%)</b>     |                                  |                                      |                     |

|                                  |            |            |       |
|----------------------------------|------------|------------|-------|
| Pervious hospitalization for CHF | 126 (40.3) | 147 (47.0) | 0.107 |
| Pervious MI                      | 77 (24.6)  | 75 (24.0)  | 0.926 |
| Pervious stroke                  | 37 (11.8)  | 35 (11.2)  | 0.900 |
| Pervious CABG                    | 63 (20.1)  | 61 (19.5)  | 0.920 |
| Pervious PCI                     | 72 (23.0)  | 78 (24.9)  | 0.640 |
| COPD                             | 54 (17.3)  | 49 (15.7)  | 0.666 |
| Hypertension                     | 286 (91.4) | 285 (91.1) | 1.000 |
| Peripheral artery disease        | 40 (12.8)  | 39 (12.5)  | 1.000 |
| Dyslipidemia                     | 234 (74.8) | 221 (70.6) | 0.282 |
| AF                               | 141 (45.0) | 139 (44.4) | 0.936 |
| Diabetes                         | 133 (42.5) | 147 (47.0) | 0.296 |
| <b>Medications, n (%)</b>        |            |            |       |
| Diuretic                         | 281 (89.8) | 278 (88.8) | 0.796 |
| ACEI                             | 153 (48.9) | 169 (54.0) | 0.230 |
| ARB                              | 93 (29.7)  | 82 (26.2)  | 0.373 |
| Beta blocker                     | 259 (82.7) | 259 (82.7) | 1.000 |
| Calcium channel blocker          | 128 (40.9) | 120 (38.3) | 0.567 |
| Aspirin                          | 200 (63.9) | 185 (59.1) | 0.250 |
| Statin                           | 210 (67.1) | 193 (61.7) | 0.182 |
| Warfarin                         | 113 (36.1) | 108 (34.5) | 0.738 |

BMI: body mass index, EF: ejection fraction, NYHA: New York heart function class, bpm: beat per minutes, SBP: systolic blood pressure, DBP: diastolic blood pressure, GFR: estimated glomerular filtration rate, BNP: B-type natriuretic peptide, CHF: chronic heart failure, MI: myocardial infarction, CABG: coronary artery bypass grafting, PCI: Percutaneous coronary intervention, COPD: chronic obstructive pulmonary disease, AF: Atrial fibrillation, ACEI: angiotensin converting enzyme inhibitor, ARB: angiotensin

receptor blocker.
